# Supplementary material
Source: publisher figshare collection journal article supplement (https://acs.figshare.com/ndownloader/files/5720412)
Supplement: Supplementary file 1 [file 5720412]

# ja003393a.cif

;
data_General

#==============================================================================

_audit_creation_date                  '2000-08-21'
_audit_creation_method                'by teXsan for Windows'
_audit_update_record
;
?
;

#==============================================================================

# SUBMISSION DETAILS

_publ_requested_journal 'Jouranal of the American Chemical Society'

_publ_requested_category            'FO or CO'

_publ_contact_author_name           'Takayuki Kawashima'

_publ_contact_author_address
;
    Department of Chemistry
    Graduate School of Science
    The University of Tokyo
    7-3-1 Hongo, Bunkyo-ku, Tokyo
    113-0033, Japan
;
_publ_contact_letter
;
    ENTER TEXT OF LETTER
;

_publ_requested_coeditor_name          ?
_publ_contact_author_phone            '+81-3-5841-4338'
_publ_contact_author_fax              '+81-3-5800-6899'
_publ_contact_author_email            'takayuki@chem.s.u-tokyo.ac.jp'

#==============================================================================

# PROCESSING SUMMARY (IUCr Office Use Only)

_journal_date_recd_electronic     ?
_journal_date_to_coeditor         ?
_journal_date_from_coeditor       ?
_journal_date_accepted            ?
_journal_date_printers_first      ?
_journal_date_printers_final      ?
_journal_date_proofs_out          ?
_journal_date_proofs_in           ?
_journal_coeditor_name            ?
_journal_coeditor_code            ?
_journal_coeditor_notes
; ?
;
_journal_techeditor_code          ?
_journal_techeditor_notes
; ?
;
_journal_coden_ASTM               ?
_journal_name_full                ?
_journal_year                     ?
_journal_volume                   ?
_journal_issue                    ?
_journal_page_first               ?
_journal_page_last                ?
_journal_suppl_publ_number        ?
_journal_suppl_publ_pages         ?

#==============================================================================

# TITLE AND AUTHOR LIST


_publ_section_title
;
Synthesis, Structure, and Reactions of a Tricoordinate 1,2-Iodoxetane
;

_publ_section_title_footnote
;
    ENTER ANY FOOTNOTES TO TITLE
;
loop_
_publ_author_name
_publ_author_footnote
_publ_author_address
'Takayuki Kawashima'
''
;
Department of Chemistry, Graduate School of Science,
The University of Tokyo
7-3-1 Hongo, Bunkyo-ku, Tokyo 113-0033, Japan
;
'Kazuhisa Hoshiba'
''
;
Department of Chemistry, Graduate School of Science,
The University of Tokyo
7-3-1 Hongo, Bunkyo-ku, Tokyo 113-0033, Japan
;
'Naokazu Kano'
''
;
Department of Chemistry, Graduate School of Science,
The University of Tokyo
7-3-1 Hongo, Bunkyo-ku, Tokyo 113-0033, Japan
;

#==============================================================================

# TEXT


_publ_section_abstract
;
    ENTER ABSTRACT
;

_publ_section_exptl_refinement
;
    ENTER EXPERIMENTAL SECTION
;

_publ_section_comment
;
    ENTER TEXT
;

_publ_section_references
;
Molecular Structure Corporation. (1997-1999). teXsan for Windows.
Single Crystal Structure Analysis Software. Version 1.06.
MSC, 9009 New Trails Drive, The Woodlands, TX 77381, USA.
Rigaku Corporation (1999). CrystalClear.
;

_publ_section_acknowledgements
;
    ENTER ACKNOWLEDGEMENTS
;

_publ_section_table_legends
;
    ENTER TABLE LEGENDS
;

_publ_section_figure_captions
;
    ENTER FIGURE CAPTIONS
;

#==============================================================================

data__1,2-Iodoxetane

#==============================================================================

_computing_data_collection            'CrystalClear (Rigaku Corporation, 1999)'
_computing_cell_refinement            'CrystalClear (Rigaku Corporation, 1999)'
_computing_data_reduction             'CrystalClear (Rigaku Corporation, 1999)'
_computing_structure_solution          SIR92
_computing_structure_refinement
'teXsan for Windows version (MSC, 1997-1999)'
_computing_publication_material
'teXsan for Windows version (MSC, 1997-1999)'
#------------------------------------------------------------------------------
_cell_length_a                         6.845(2)
_cell_length_b                         17.687(8)
_cell_length_c                         10.888(4)
_cell_angle_alpha                      90
_cell_angle_beta                       98.28(2)
_cell_angle_gamma                      90
_cell_volume                           1304.4(8)
_cell_formula_units_Z                  4
_cell_measurement_temperature          297.2
_cell_measurement_reflns_used          0
_cell_measurement_theta_min            0.0
_cell_measurement_theta_max            0.0
#------------------------------------------------------------------------------
_symmetry_cell_setting                 monoclinic
_symmetry_space_group_name_H-M        'P 21/c     '
_symmetry_Int_Tables_number            14
_symmetry_space_group_name_Hall        ?
loop_
_symmetry_equiv_pos_as_xyz
  '   +x,   +y,   +z'
  '   -x,1/2+y,1/2-z'
  '   -x,   -y,   -z'
  '   +x,1/2-y,1/2+z'
#------------------------------------------------------------------------------

_publ_section_exptl_prep
;
    ENTER EXPERIMENTAL SECTION
;
_exptl_crystal_description            'Prism'
_exptl_crystal_colour                 'Colorless'
_exptl_crystal_size_max                0.30
_exptl_crystal_size_mid                0.15
_exptl_crystal_size_min                0.15
_exptl_crystal_density_diffrn          2.464
_exptl_crystal_density_meas            'not measured'
_chemical_formula_weight               483.98
_chemical_formula_analytical           ?
_chemical_formula_sum                  'C8 H F12 I O2 '
_chemical_formula_moiety               'C8 H F12 I O2 '
_chemical_formula_structural           ?
_chemical_compound_source              ?
_exptl_crystal_F_000                   904.00
_exptl_absorpt_coefficient_mu          2.609
_exptl_absorpt_correction_type         none
_exptl_special_details
;
?
;

#==============================================================================

# EXPERIMENTAL DATA

_diffrn_special_details
;
?
;
_diffrn_ambient_temperature            297.2
_diffrn_radiation_wavelength           0.7107
_diffrn_radiation_type                 'Mo K\a'
_diffrn_radiation_source              'X-ray tube'
_diffrn_radiation_monochromator        graphite
_diffrn_radiation_detector            'CCD'
_diffrn_measurement_device            'Rigaku Mercury CCD'
_diffrn_detector_area_resol_mean      ?
_diffrn_measurement_method            \w

_diffrn_standards_number              0
_diffrn_standards_interval_count      0
_diffrn_standards_decay_%             0.00
loop_
_diffrn_standard_refln_index_h       ?
_diffrn_standard_refln_index_k       ?
_diffrn_standard_refln_index_l       ?
_diffrn_reflns_number                  3066
_reflns_number_total                   3066
_reflns_number_gt                      2964
_reflns_threshold_expression           I>-10.00\s(I)
_diffrn_reflns_av_R_equivalents        0.04803
_diffrn_reflns_av_sigmaI/netI          0.155
_diffrn_reflns_theta_full              ?
_diffrn_measured_fraction_theta_max    ?
_diffrn_measured_fraction_theta_full   ?
_diffrn_reflns_limit_h_min             0
_diffrn_reflns_limit_h_max             8
_diffrn_reflns_limit_k_min             0
_diffrn_reflns_limit_k_max             22
_diffrn_reflns_limit_l_min             -14
_diffrn_reflns_limit_l_max             13
_diffrn_reflns_theta_min               4.03
_diffrn_reflns_theta_max               27.48
_diffrn_reflns_reduction_process      'Lp corrections applied'
_diffrn_orient_matrix_UB_11            0.00000
_diffrn_orient_matrix_UB_12            0.00000
_diffrn_orient_matrix_UB_13            0.00000
_diffrn_orient_matrix_UB_21            0.00000
_diffrn_orient_matrix_UB_22            0.00000
_diffrn_orient_matrix_UB_23            0.00000
_diffrn_orient_matrix_UB_31            0.00000
_diffrn_orient_matrix_UB_32            0.00000
_diffrn_orient_matrix_UB_33            0.00000
#------------------------------------------------------------------------------
loop_
_atom_type_symbol
_atom_type_oxidation_number
_atom_type_number_in_cell
_atom_type_scat_dispersion_real
_atom_type_scat_dispersion_imag
_atom_type_scat_source
  I  0     4 -0.726 1.812
;International Tables for Crystallography
(1992, Vol. C, Table 6.1.1.2)
;
  F  0    48 0.014 0.010
;International Tables for Crystallography
(1992, Vol. C, Table 6.1.1.2)
;
  O  0     8 0.008 0.006
;International Tables for Crystallography
(1992, Vol. C, Table 6.1.1.2)
;
  C  0    32 0.002 0.002
;International Tables for Crystallography
(1992, Vol. C, Table 6.1.1.2)
;
  H  0     4 0.000 0.000
;International Tables for Crystallography
(1992, Vol. C, Table 6.1.1.2)
;

#==============================================================================

# ATOMIC COORDINATES AND THERMAL PARAMETERS

loop_
_atom_site_label
_atom_site_fract_x
_atom_site_fract_y
_atom_site_fract_z
_atom_site_U_iso_or_equiv
_atom_site_occupancy
_atom_site_refinement_flags
_atom_site_adp_type
_atom_site_calc_flag
_atom_site_calc_attached_atom
I(1) 0.34543(5) 0.10556(2) 0.48580(3) 0.04248(9) 1.000   .  Uani d ?
F(1) 0.1527(7) 0.3576(2) 0.5202(3) 0.091(1) 1.000   .  Uani d ?
F(2) 0.3883(7) 0.3107(3) 0.6433(5) 0.120(2) 1.000   .  Uani d ?
F(3) 0.1209(8) 0.3373(2) 0.7086(4) 0.102(2) 1.000   .  Uani d ?
F(4) -0.1694(6) 0.2696(3) 0.4562(5) 0.116(2) 1.000   .  Uani d ?
F(5) -0.1511(6) 0.1546(3) 0.5168(5) 0.104(2) 1.000   .  Uani d ?
F(6) -0.1888(7) 0.2428(3) 0.6445(5) 0.112(2) 1.000   .  Uani d ?
F(7) 0.6920(5) 0.1048(2) 0.7717(3) 0.078(1) 1.000   .  Uani d ?
F(8) 0.6625(6) -0.0044(2) 0.8478(4) 0.085(1) 1.000   .  Uani d ?
F(9) 0.5165(6) 0.0904(2) 0.9158(3) 0.083(1) 1.000   .  Uani d ?
F(10) 0.0843(5) -0.0170(2) 0.6698(4) 0.081(1) 1.000   .  Uani d ?
F(11) 0.3108(6) -0.0766(2) 0.7841(4) 0.088(1) 1.000   .  Uani d ?
F(12) 0.1660(6) 0.0165(2) 0.8579(4) 0.082(1) 1.000   .  Uani d ?
O(1) 0.2033(6) 0.2092(2) 0.4737(3) 0.056(1) 1.000   .  Uani d ?
O(2) 0.4525(6) 0.0154(2) 0.6087(3) 0.053(1) 1.000   .  Uani d ?
C(1) 0.1266(8) 0.2292(3) 0.5801(5) 0.044(1) 1.000   .  Uani d ?
C(2) 0.1932(8) 0.1773(3) 0.6924(5) 0.045(1) 1.000   .  Uani d ?
C(3) 0.2893(7) 0.1184(3) 0.6669(4) 0.042(1) 1.000   .  Uani d ?
C(4) 0.3870(7) 0.0450(3) 0.7150(4) 0.040(1) 1.000   .  Uani d ?
C(5) 0.198(1) 0.3096(3) 0.6129(6) 0.062(2) 1.000   .  Uani d ?
C(6) -0.100(1) 0.2255(4) 0.5492(7) 0.070(2) 1.000   .  Uani d ?
C(7) 0.5683(8) 0.0591(3) 0.8157(5) 0.051(2) 1.000   .  Uani d ?
C(8) 0.2359(9) -0.0085(3) 0.7589(6) 0.056(2) 1.000   .  Uani d ?
H(1) 0.155(9) 0.187(4) 0.775(6) 0.08(1) 1.000   .  Uiso d ?

loop_
_atom_site_aniso_label
_atom_site_aniso_U_11
_atom_site_aniso_U_22
_atom_site_aniso_U_33
_atom_site_aniso_U_12
_atom_site_aniso_U_13
_atom_site_aniso_U_23
I(1)   0.0514(2)   0.0434(2)   0.0332(2)   0.0036(2)   0.0081(1)   -0.0040(2)
F(1)   0.167(4)    0.038(2)    0.070(2)    -0.001(2)   0.027(3)    0.017(2)
F(2)   0.096(3)    0.074(3)    0.181(5)    -0.037(3)   -0.012(3)   -0.002(3)
F(3)   0.192(5)    0.054(2)    0.064(2)    0.007(3)    0.036(3)    -0.012(2)
F(4)   0.081(3)    0.134(4)    0.126(4)    0.030(3)    -0.009(3)   0.062(3)
F(5)   0.068(2)    0.091(3)    0.146(4)    -0.020(2)   -0.010(3)   0.000(3)
F(6)   0.083(3)    0.134(4)    0.131(4)    0.035(3)    0.056(3)    0.023(3)
F(7)   0.064(2)    0.093(3)    0.073(2)    -0.020(2)   -0.000(2)   0.013(2)
F(8)   0.082(3)    0.075(3)    0.091(3)    0.023(2)    -0.016(2)   0.016(2)
F(9)   0.085(3)    0.117(3)    0.045(2)    0.001(2)    0.001(2)    -0.025(2)
F(10)  0.071(2)    0.077(3)    0.086(3)    -0.025(2)   -0.012(2)   0.001(2)
F(11)  0.102(3)    0.042(2)    0.119(3)    0.002(2)    0.014(3)    0.021(2)
F(12)  0.097(3)    0.082(3)    0.076(2)    -0.016(2)   0.046(2)    -0.004(2)
O(1)   0.076(3)    0.050(2)    0.045(2)    0.016(2)    0.018(2)    0.004(2)
O(2)   0.071(2)    0.053(2)    0.036(2)    0.016(2)    0.011(2)    -0.003(2)
C(1)   0.052(3)    0.037(3)    0.043(3)    0.006(2)    0.013(2)    0.005(2)
C(2)   0.058(3)    0.038(3)    0.041(3)    0.003(3)    0.012(2)    -0.000(2)
C(3)   0.047(3)    0.043(3)    0.035(2)    -0.002(2)   0.005(2)    -0.003(2)
C(4)   0.049(3)    0.041(3)    0.031(2)    0.006(2)    0.006(2)    -0.002(2)
C(5)   0.093(5)    0.040(3)    0.055(3)    -0.000(3)   0.017(3)    -0.000(3)
C(6)   0.060(4)    0.069(5)    0.081(5)    0.016(4)    0.009(3)    0.014(4)
C(7)   0.055(3)    0.055(4)    0.043(3)    0.005(3)    0.004(2)    0.005(3)
C(8)   0.070(4)    0.041(3)    0.057(3)    -0.001(3)   0.013(3)    0.003(3)

#==============================================================================

# REFINEMENT DATA

_refine_special_details
;
?
;
_refine_ls_structure_factor_coef       Fsqd
_refine_ls_matrix_type                 full
_refine_ls_weighting_scheme            sigma
_refine_ls_weighting_details           'w = 1/[\s^2^(Fo) + 0.00002|Fo|^2^]'
_refine_ls_hydrogen_treatment          refall
_refine_ls_extinction_method           none
_refine_ls_extinction_coef             ?
_refine_ls_abs_structure_details       ?
_refine_ls_abs_structure_Flack         ?
_refine_ls_number_reflns               2964
_refine_ls_number_parameters           212
_refine_ls_number_restraints           0
_refine_ls_number_constraints          0
_refine_ls_R_factor_all                0.0493
_refine_ls_R_factor_gt                 0.0505
_refine_ls_wR_factor_all               0.0750
_refine_ls_wR_factor_ref               0.0766
_refine_ls_goodness_of_fit_all         0.724
_refine_ls_goodness_of_fit_ref         0.720
_refine_ls_shift/su_max                0.0000
_refine_ls_shift/su_mean               0.0000
_refine_diff_density_min               -1.28
_refine_diff_density_max               0.84

#==============================================================================

# MOLECULAR GEOMETRY

_geom_special_details
;
?
;
loop_
_geom_bond_atom_site_label_1
_geom_bond_atom_site_label_2
_geom_bond_distance
_geom_bond_site_symmetry_1
_geom_bond_site_symmetry_2
_geom_bond_publ_flag
I(1) O(1) 2.070(3) . . ?
I(1) O(2) 2.142(3) . . ?
I(1) C(3) 2.075(4) . . ?
F(1) C(5) 1.321(5) . . ?
F(2) C(5) 1.295(7) . . ?
F(3) C(5) 1.329(6) . . ?
F(4) C(6) 1.311(6) . . ?
F(5) C(6) 1.335(7) . . ?
F(6) C(6) 1.310(7) . . ?
F(7) C(7) 1.310(5) . . ?
F(8) C(7) 1.317(5) . . ?
F(9) C(7) 1.315(5) . . ?
F(10) C(8) 1.323(6) . . ?
F(11) C(8) 1.322(6) . . ?
F(12) C(8) 1.318(6) . . ?
O(1) C(1) 1.384(5) . . ?
O(2) C(4) 1.401(5) . . ?
C(1) C(2) 1.545(6) . . ?
C(1) C(5) 1.531(6) . . ?
C(1) C(6) 1.543(7) . . ?
C(2) C(3) 1.283(6) . . ?
C(2) H(1) 0.99(5) . . ?
C(3) C(4) 1.519(6) . . ?
C(4) C(7) 1.554(6) . . ?
C(4) C(8) 1.529(6) . . ?
#------------------------------------------------------------------------------
loop_
_geom_angle_atom_site_label_1
_geom_angle_atom_site_label_2
_geom_angle_atom_site_label_3
_geom_angle
_geom_angle_site_symmetry_1
_geom_angle_site_symmetry_2
_geom_angle_site_symmetry_3
_geom_angle_publ_flag
O(1) I(1)  O(2) 144.5(1) . . . ?
O(1) I(1)  C(3) 79.3(1) . . . ?
O(2) I(1)  C(3) 65.2(1) . . . ?
I(1) O(1)  C(1) 113.9(2) . . . ?
I(1) O(2)  C(4) 96.7(2) . . . ?
O(1) C(1)  C(2) 114.0(3) . . . ?
O(1) C(1)  C(5) 106.6(4) . . . ?
O(1) C(1)  C(6) 107.4(4) . . . ?
C(2) C(1)  C(5) 108.6(4) . . . ?
C(2) C(1)  C(6) 108.7(4) . . . ?
C(5) C(1)  C(6) 111.7(4) . . . ?
C(1) C(2)  C(3) 114.4(4) . . . ?
C(1) C(2)  H(1) 122(3) . . . ?
C(3) C(2)  H(1) 124(3) . . . ?
I(1) C(3)  C(2) 117.7(3) . . . ?
I(1) C(3)  C(4) 95.8(3) . . . ?
C(2) C(3)  C(4) 146.4(4) . . . ?
O(2) C(4)  C(3) 102.2(3) . . . ?
O(2) C(4)  C(7) 109.0(4) . . . ?
O(2) C(4)  C(8) 109.8(4) . . . ?
C(3) C(4)  C(7) 111.9(4) . . . ?
C(3) C(4)  C(8) 110.7(4) . . . ?
C(7) C(4)  C(8) 112.8(4) . . . ?
F(1) C(5)  F(2) 107.7(5) . . . ?
F(1) C(5)  F(3) 106.6(4) . . . ?
F(1) C(5)  C(1) 112.7(4) . . . ?
F(2) C(5)  F(3) 107.1(5) . . . ?
F(2) C(5)  C(1) 110.5(4) . . . ?
F(3) C(5)  C(1) 112.0(4) . . . ?
F(4) C(6)  F(5) 107.7(5) . . . ?
F(4) C(6)  F(6) 108.5(5) . . . ?
F(4) C(6)  C(1) 112.5(5) . . . ?
F(5) C(6)  F(6) 107.3(5) . . . ?
F(5) C(6)  C(1) 108.2(4) . . . ?
F(6) C(6)  C(1) 112.5(5) . . . ?
F(7) C(7)  F(8) 107.8(4) . . . ?
F(7) C(7)  F(9) 108.1(4) . . . ?
F(7) C(7)  C(4) 109.5(4) . . . ?
F(8) C(7)  F(9) 108.6(4) . . . ?
F(8) C(7)  C(4) 111.1(4) . . . ?
F(9) C(7)  C(4) 111.7(4) . . . ?
F(10) C(8)  F(11) 106.8(4) . . . ?
F(10) C(8)  F(12) 107.4(4) . . . ?
F(10) C(8)  C(4) 109.6(4) . . . ?
F(11) C(8)  F(12) 108.2(4) . . . ?
F(11) C(8)  C(4) 111.7(4) . . . ?
F(12) C(8)  C(4) 112.9(4) . . . ?
#------------------------------------------------------------------------------
loop_
_geom_contact_atom_site_label_1
_geom_contact_atom_site_label_2
_geom_contact_distance
_geom_contact_site_symmetry_1
_geom_contact_site_symmetry_2
_geom_contact_publ_flag
I(1)      O(2)      2.821(3)   . 3_656 no
I(1)      F(3)      3.340(4)   . 4_554 no
I(1)      F(5)      3.522(4)   . 1_655 no
I(1)      F(10)     3.541(3)   . 3_556 no
F(1)      F(12)     2.852(4)   . 4_554 no
F(1)      F(8)      3.016(5)   . 2_656 no
F(1)      F(9)      3.026(5)   . 4_554 no
F(2)      F(11)     2.893(5)   . 2_656 no
F(2)      F(6)      3.132(6)   . 1_655 no
F(2)      F(9)      3.254(5)   . 4_554 no
F(2)      F(8)      3.291(6)   . 2_656 no
F(3)      O(1)      2.977(5)   . 4 no
F(3)      F(8)      3.267(5)   . 2_656 no
F(3)      F(10)     3.302(5)   . 2_556 no
F(3)      F(11)     3.335(5)   . 2_556 no
F(4)      F(7)      3.053(5)   . 4_454 no
F(4)      F(9)      3.268(5)   . 4_454 no
F(4)      F(6)      3.384(6)   . 4_554 no
F(5)      F(7)      3.238(5)   . 1_455 no
F(5)      F(10)     3.244(6)   . 3_556 no
F(5)      F(11)     3.577(6)   . 3_556 no
F(6)      F(7)      2.977(5)   . 1_455 no
F(6)      F(11)     3.419(6)   . 2_556 no
F(8)      F(12)     3.256(5)   . 3_657 no
F(8)      F(9)      3.369(5)   . 3_657 no
F(8)      C(5)      3.434(6)   . 2_646 no
F(8)      F(12)     3.452(5)   . 1_655 no
F(9)      F(11)     3.320(5)   . 3_657 no
F(9)      F(12)     3.581(5)   . 3_657 no
O(2)      O(2)      2.601(6)   . 3_656 no
#------------------------------------------------------------------------------
loop_
_geom_torsion_atom_site_label_1
_geom_torsion_atom_site_label_2
_geom_torsion_atom_site_label_3
_geom_torsion_atom_site_label_4
_geom_torsion_site_symmetry_1
_geom_torsion_site_symmetry_2
_geom_torsion_site_symmetry_3
_geom_torsion_site_symmetry_4
_geom_torsion
_geom_torsion_publ_flag
I(1) O(1) C(1) C(2) . . . . 10.0(5) no
I(1) O(1) C(1) C(5) . . . . 129.8(3) no
I(1) O(1) C(1) C(6) . . . . -110.4(4) no
I(1) O(2) C(4) C(3) . . . . -0.0(3) no
I(1) O(2) C(4) C(7) . . . . -118.6(3) no
I(1) O(2) C(4) C(8) . . . . 117.4(3) no
I(1) C(3) C(2) C(1) . . . . 2.0(5) no
I(1) C(3) C(4) O(2) . . . . 0.0(3) no
I(1) C(3) C(4) C(7) . . . . 116.5(3) no
I(1) C(3) C(4) C(8) . . . . -116.8(3) no
F(1) C(5) C(1) O(1) . . . . 54.9(6) no
F(1) C(5) C(1) C(2) . . . . 178.1(4) no
F(1) C(5) C(1) C(6) . . . . -62.1(6) no
F(2) C(5) C(1) O(1) . . . . -65.6(5) no
F(2) C(5) C(1) C(2) . . . . 57.6(5) no
F(2) C(5) C(1) C(6) . . . . 177.4(4) no
F(3) C(5) C(1) O(1) . . . . 175.1(4) no
F(3) C(5) C(1) C(2) . . . . -61.7(6) no
F(3) C(5) C(1) C(6) . . . . 58.1(6) no
F(4) C(6) C(1) O(1) . . . . -57.8(6) no
F(4) C(6) C(1) C(2) . . . . 178.5(5) no
F(4) C(6) C(1) C(5) . . . . 58.7(6) no
F(5) C(6) C(1) O(1) . . . . 61.0(5) no
F(5) C(6) C(1) C(2) . . . . -62.6(6) no
F(5) C(6) C(1) C(5) . . . . 177.5(4) no
F(6) C(6) C(1) O(1) . . . . 179.4(4) no
F(6) C(6) C(1) C(2) . . . . 55.7(6) no
F(6) C(6) C(1) C(5) . . . . -64.1(6) no
F(7) C(7) C(4) O(2) . . . . 57.3(5) no
F(7) C(7) C(4) C(3) . . . . -55.0(5) no
F(7) C(7) C(4) C(8) . . . . 179.5(4) no
F(8) C(7) C(4) O(2) . . . . -61.6(5) no
F(8) C(7) C(4) C(3) . . . . -174.0(4) no
F(8) C(7) C(4) C(8) . . . . 60.5(5) no
F(9) C(7) C(4) O(2) . . . . 176.9(4) no
F(9) C(7) C(4) C(3) . . . . 64.6(5) no
F(9) C(7) C(4) C(8) . . . . -60.9(5) no
F(10) C(8) C(4) O(2) . . . . -59.4(5) no
F(10) C(8) C(4) C(3) . . . . 52.7(5) no
F(10) C(8) C(4) C(7) . . . . 178.8(4) no
F(11) C(8) C(4) O(2) . . . . 58.7(5) no
F(11) C(8) C(4) C(3) . . . . 170.8(4) no
F(11) C(8) C(4) C(7) . . . . -63.0(5) no
F(12) C(8) C(4) O(2) . . . . -179.1(4) no
F(12) C(8) C(4) C(3) . . . . -67.0(5) no
F(12) C(8) C(4) C(7) . . . . 59.1(5) no
O(1) I(1) O(2) C(4) . . . . 2.1(4) no
O(1) I(1) C(3) C(2) . . . . 2.5(4) no
O(1) I(1) C(3) C(4) . . . . -178.8(3) no
O(1) C(1) C(2) C(3) . . . . -8.0(6) no
O(2) I(1) O(1) C(1) . . . . -8.9(4) no
O(2) I(1) C(3) C(2) . . . . -178.7(4) no
O(2) I(1) C(3) C(4) . . . . -0.0(2) no
O(2) C(4) C(3) C(2) . . . . 177.9(7) no
C(1) O(1) I(1) C(3) . . . . -7.0(3) no
C(1) C(2) C(3) C(4) . . . . -175.5(6) no
C(2) C(3) C(4) C(7) . . . . -65.6(8) no
C(2) C(3) C(4) C(8) . . . . 61.0(8) no
C(3) I(1) O(2) C(4) . . . . 0.0(2) no
C(3) C(2) C(1) C(5) . . . . -126.7(5) no
C(3) C(2) C(1) C(6) . . . . 111.6(5) no

#===END
